# Supplementary material
Source: Springer Nature journal article supplement (https://www.springermedizin.de/resource/supplementary/12885_2013_4078_MOESM2_ESM.pdf/9465248)
Supplement: MOESM2 [file 9465248]

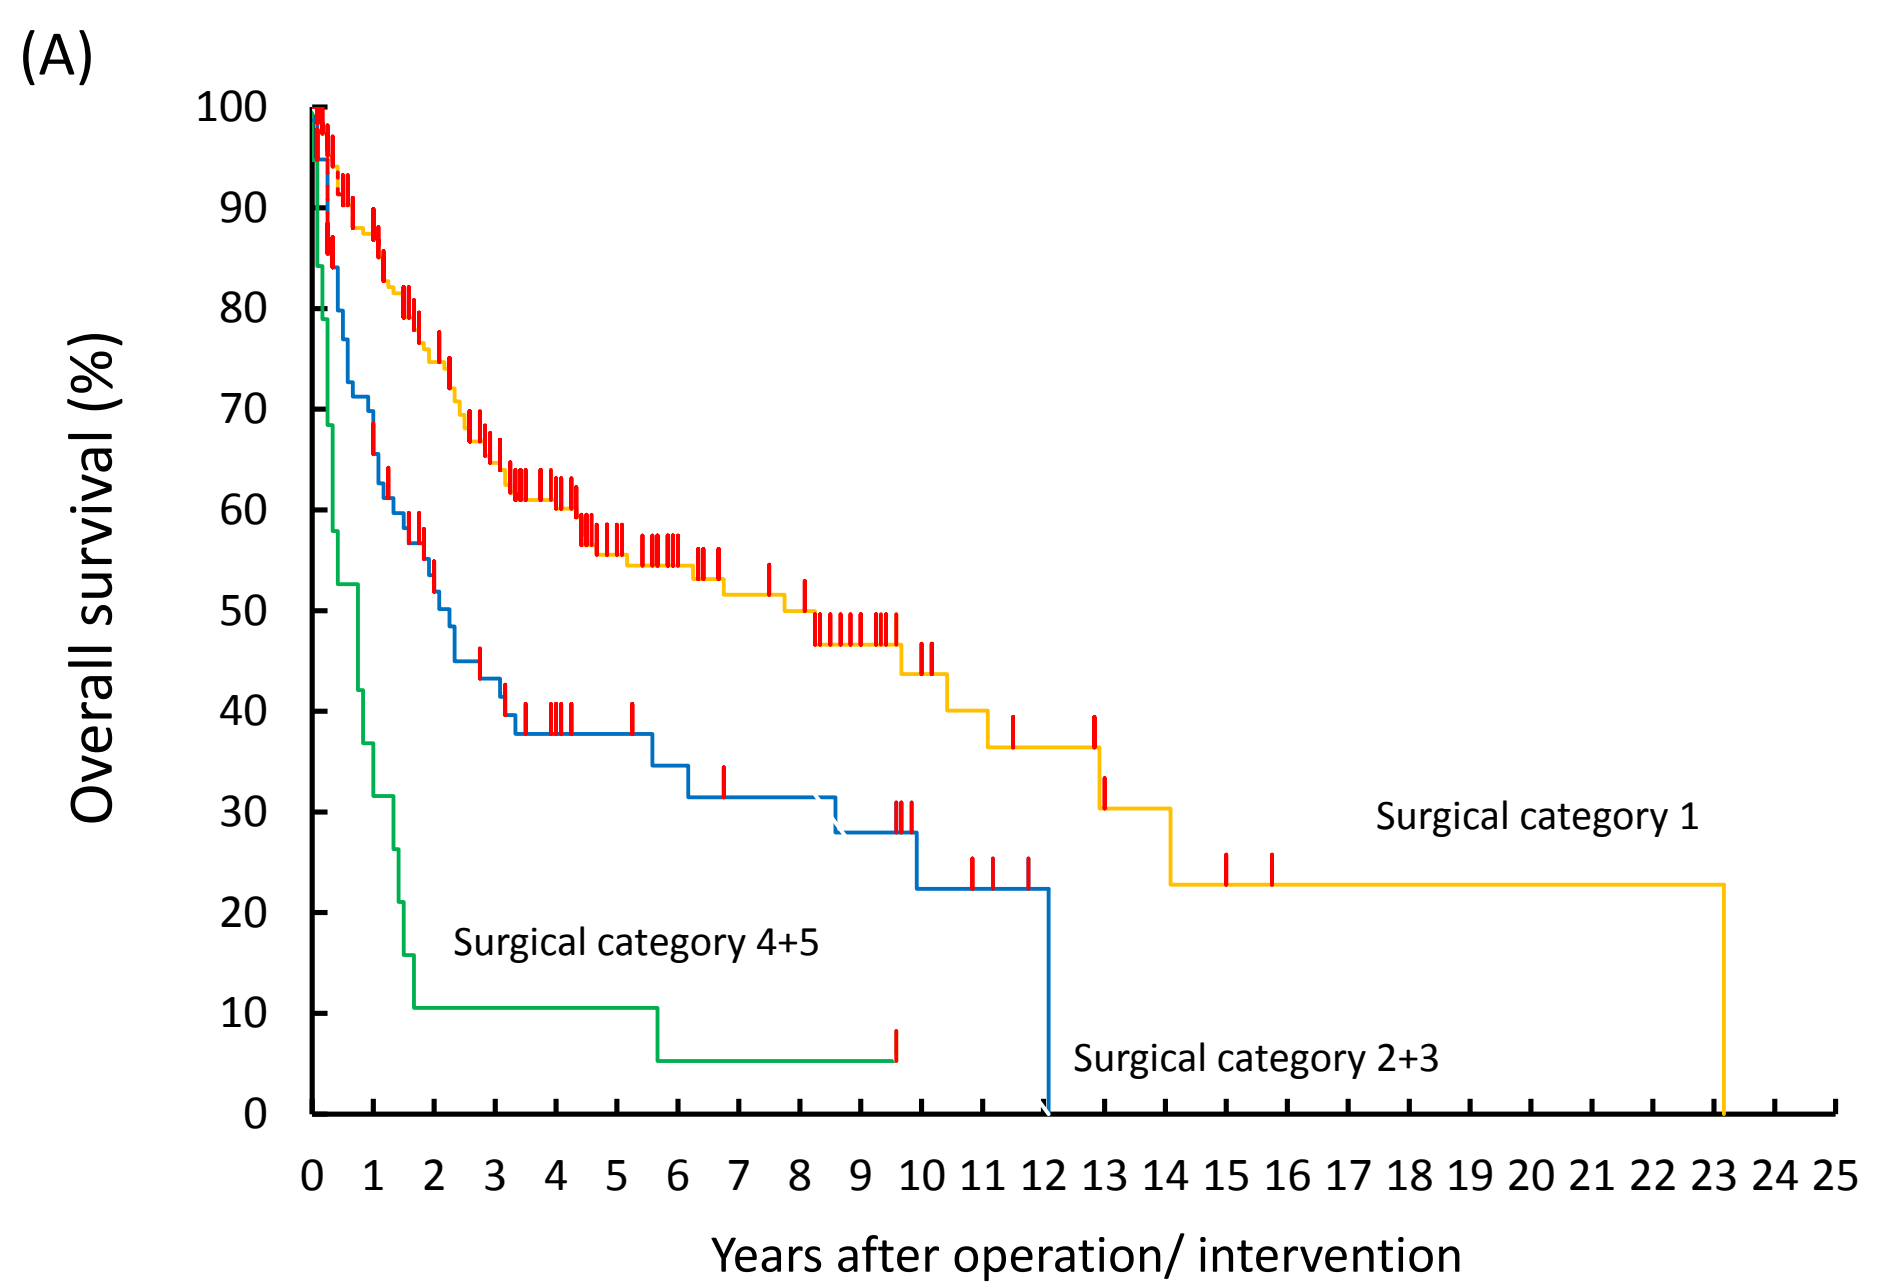

| Surgical category | No. of Patients at Risk |     |    |    |    |    |    |   |   |  | No. Who died |
|-------------------|-------------------------|-----|----|----|----|----|----|---|---|--|--------------|
| 1                 | 196                     | 119 | 73 | 42 | 32 | 15 | 10 | 5 | 1 |  | 82           |
| 2+3               | 77                      | 33  | 18 | 12 | 10 | 5  | 2  | 0 | 0 |  | 47           |
| 4+5               | 19                      | 3   | 3  | 1  | 1  | 3  | 0  | 0 | 0 |  | 18           |

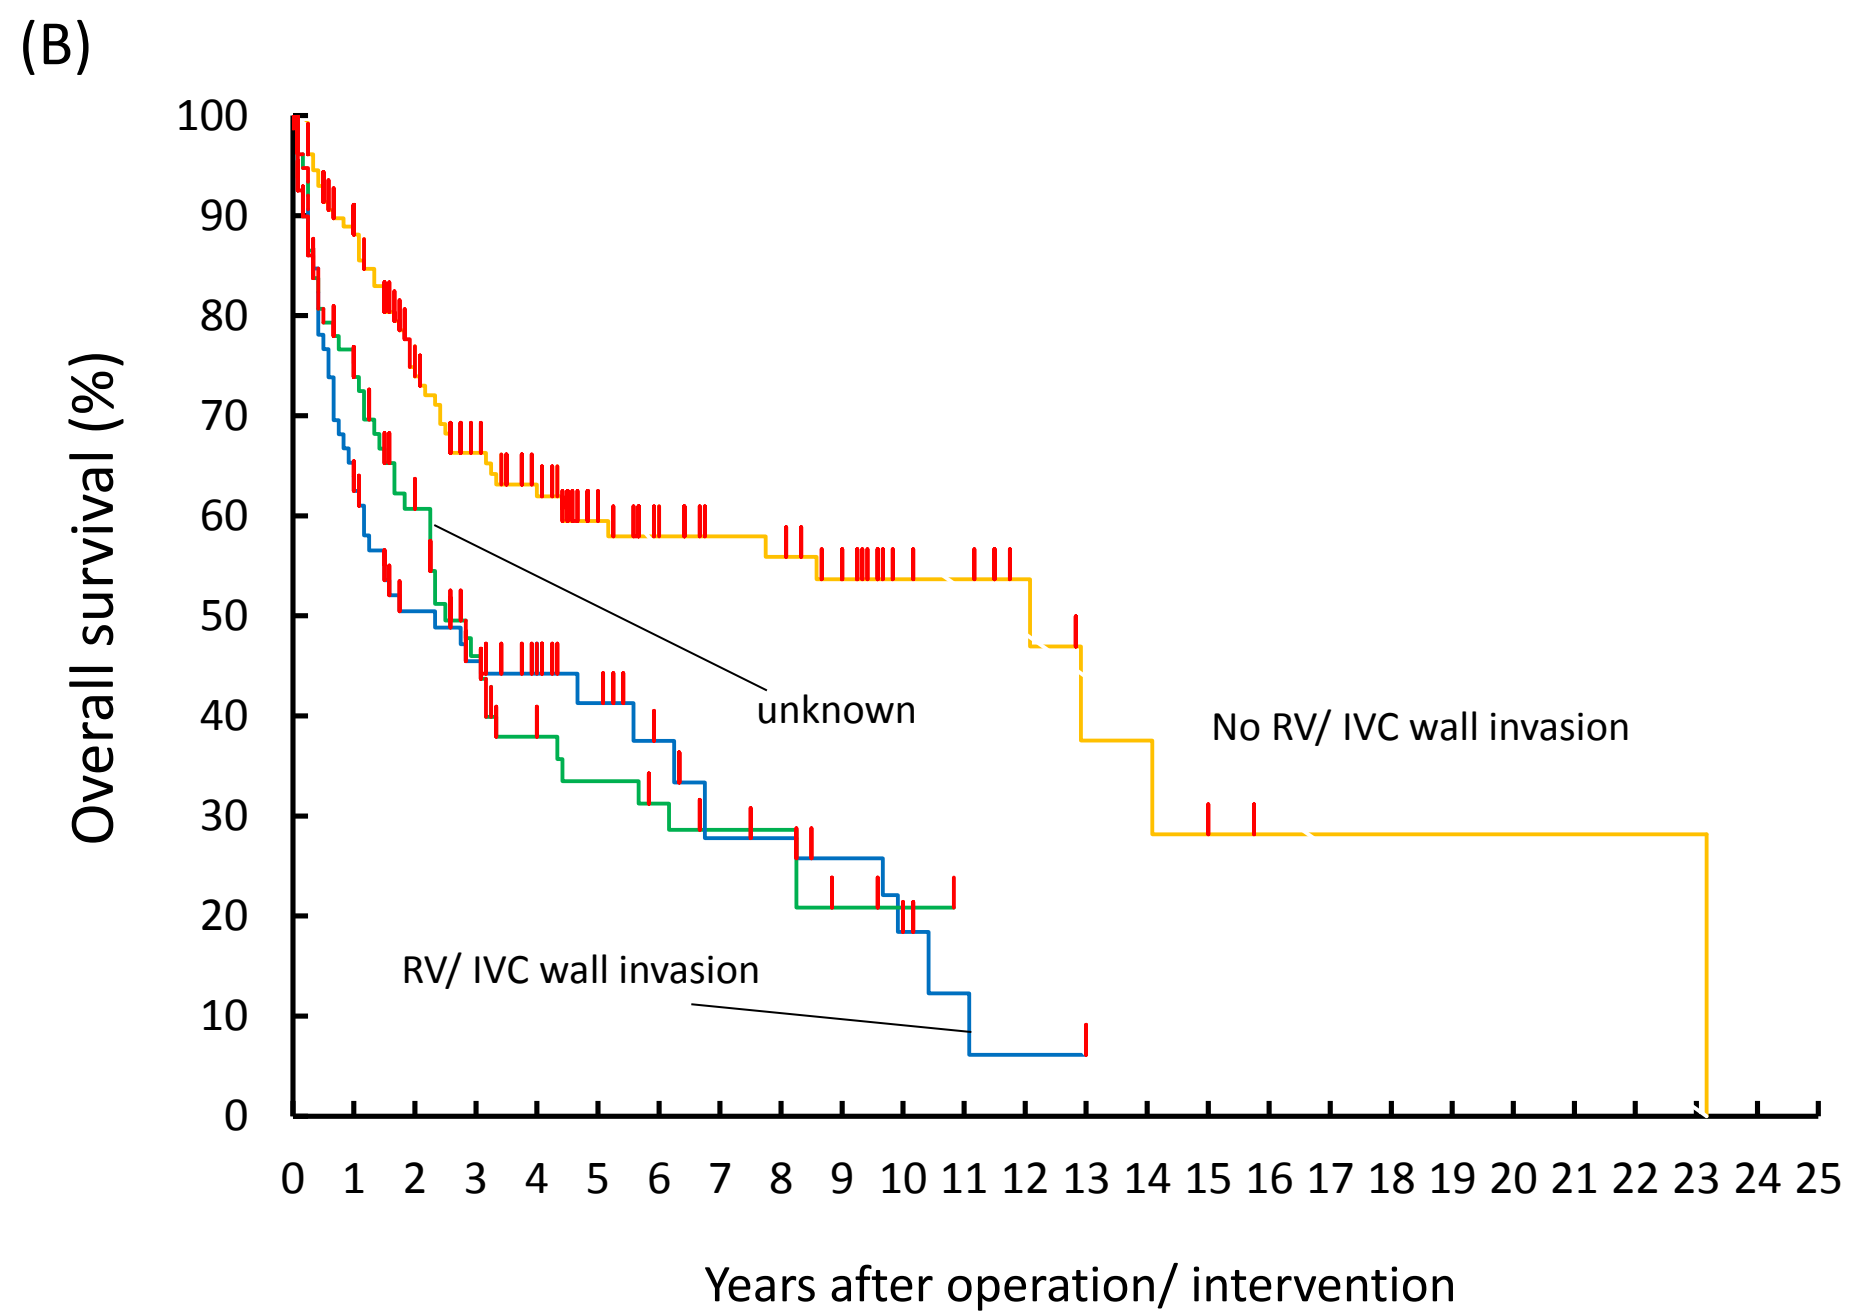

| RV/IVC wall invasion | No. of Patients at Risk |    |    |    |    |    |   |   |   |  | No. Who died |
|----------------------|-------------------------|----|----|----|----|----|---|---|---|--|--------------|
| no                   | 133                     | 81 | 54 | 33 | 28 | 14 | 9 | 5 | 1 |  | 52           |
| yes                  | 78                      | 33 | 18 | 14 | 11 | 5  | 2 | 0 | 0 |  | 51           |
| unknown              | 81                      | 40 | 21 | 10 | 5  | 2  | 0 | 0 | 0 |  | 44           |
